# Supplementary material
Source: publisher figshare collection journal article supplement (https://wiley.figshare.com/ndownloader/files/33661430)
Supplement: Supplementary file 1 [file 33661430]

## Sheet: Sheet1
Reference	Reported OCP values	Reported PCB values	Reported PBDE or toxaphene values	Conversions
Tompson et al. 1974	This study reports DDT values in ppm in yolks on a lipid basis and a wet mass basis. Eggs were incubated for 1 month before analysis.	PCBs are reported as Aroclor mixtures	not reported	The average p`p-DDE concentration was taken across the 10 yolks presented in table 1. (Not detects were substituted by 0). Values are converted from ppm to ng/g by multiplying by 1000 (SE was calculated across the 10 yolk values reported in table 1)
Hillestad 1974	Values are reported by Keller (2013) in ng/g whole egg wet mass. Additionally, table 5 in Alava et al. (2006) reports some additional OCPs in ng/g wet mass of whole eggs.	Not reported	not reported
Clark & Krynitsky 1980	Values are reported by Keller (2013) in ng/g whole egg wet mass. We could not access the original publication. For Cm only DDTs are given, specifically a range is given with as maximun the sum of PP-DDE and PP-DDT. For Cc geometric means are used, for DDTs, only PP-DDE is given. Additionally, table 5 in Alava et al. (2006) reports additional OCPs in ng/g wet mass of whole eggs.	Only reported sum PCBs for Cm	not reported
Clark & Krynitsky 1985	This study reports mean p`,p_DDE concentrations in ug/g on a whole egg wet mass basis in figure 1. Other OCPs are mentioned in the text in ppm	Did not report PCB results because of instrument failure	not reported	Mean DDE values for freshly collected eggs (timepoint 0) were digitized from figure 1 using ImageJ. This resulted in 4.259 ug/g
Cobb & Webb 1997	Not reported	Report PCBs in homologue groups, but not as individual congeners	not reported
Podreka et al. 1998	This study reports mean p`,p-DDE concentrations in ng/g on a whole egg wet mass basis.	Not reported	not reported
Mckenzie et al. 1999	This study reports sum DDTs in ug/kg wet mass in whole eggs in table 4	This study reports individual congeners in ug/kg wet mass in whole eggs in table 4	not reported	ug/kg is equivalent to ng/g
Alam & Brim 2000	p`,p-DDD values (the only detected DDT compound) are reported for 2 nests (the only nests out of 20 were this compound was detected) in ug/g dry weight of whole eggs.	Individual PCB congener values in ng/g dry weight of whole eggs are displayed for 2 nests in figure 2. (Note: these 2 nests had the two highest sumPCB concentrations out of 20 nests)	not reported	we convert dry weight to wet mass based on their own reported conversion values for sumPCBs of 1071 ng/g dry weight = 0.24 ng/g wet mass and 16782 ng/g dry weight = 3.72 ng/g wet mass. This leads to conversion factors 4462.5 and 4511.3, we take the average of these two factors which is 4486.7 and divide all measurements in ng/g dry mass by this number. PCB values are digitized using ImageJ
Alava et al. 2006	DDT and other OCP concentrations are reported in table 3 in ng/g lipid in yolk samples	contributions (in %) of individual PCB congeners to the sumPCBs are presented in figure 3. SumPCB values are reported in table 3 in ng/g lipid in yolk samples.	not reported	DDT concentrations are converted to ng/g wet mass in yolk samples, considering the reported lipid content of 15%. Individual congener values of PCBs are digitized using ImageJ from figure 3 relative to the sumPCBs. Then, conversion to wet mass is conducted as for DDTs. (SDs were converted to wet mass, and then converted to SE using the sample size of 22. For Sum HCH, we summed alpha and beta HCH,…
van de Merwe et al. 2009	Sums of OCP groups are reported in table 2 in ng/g wet mass in whole eggs	no individual congeners reported	Only report SumPBDE values in pg/g wet mass of whole eggs in table 2	no conversion needed
Guirlet et al. 2010	Report DDT and sumHCH values in ng/g wet mass in whole eggs in table 1	contributions (in %) of individual PCB congeners to the sumPCBs are presented in figure 1. The sumPCB is ng/g wet mass in table 1.	not reported	Individual congener values of PCBs are digitized using ImageJ from figure 1 relative to the sumPCBs. (standard deviations in table 1 for SumPCB, SumDDT, SumHCH are converted to standard error using the reported sample sizes for these groups in table 1.)
van de Merwe et al. 2010	no DDTs are reported, but other OCPs are presented in pg/g wet mass of whole eggs in table 2	Individual PCB congeners are reported in table 2 in pg/g wet mass in whole eggs	Individual PBDE values are reported in pg/g wet mass in whole eggs in table 2	pg/g is converted to ng/g by dividing by 1000
Stewart et al. 2011	OCP values are reported in ng/g wet mass of whole eggs in table 4.	Individual PCB congeners are reported in ng/g wet mass of whole eggs in table 4.	PBDE values are reported in ng/g wet mass of whole eggs in table 4	no conversion needed. SE of sumDDTs calculated from the SD based on the mimimum sample size (22 eggs)
Alava et al. 2011	OCP values are reported in ng/g lipid in yolk samples in table 2	Individual PCB congener values are reported in ng/g lipid in yolk samples in table 2	PBDE values are reported in ng/g lipid in yolk samples in table 2	Values are converted to wet mass using the lipid concentrations reported in the paper: 8.42%, 7.40% and 7.41% for W. florida, E. florida and N. Carolina respectively
Keller 2013b	Report OCPs in ng/g lipid in yolk samples in table 2.	Report individual PCB congeners in ng/g lipid in yolk samples in table 2	PBDE values are reported in ng/g lipid in yolk samples in table 2	Values are converted to wet mass using the lipid concentration reported in the study (6.15%)
Dyc et al 2015	Report SumDDTs in ng/g wet mass in yolk and in whole eggs in table 1. Other OCPs are reported in table 1 and in supplement table 2 in ng/g wet mass in yolk or in whole eggs. (SumHCH includes Lindane, the concentration of which we substract for our analysis of SumHCH)	Values for individual PCB congeners are presented in supplementary table 2 in ng/g wet mass for yolks and albumen separately (and sumPCBs in table 1 in yolk and in whole eggs)	PBDE values are reported in ng/g wet mass of yolks and albumen in supplement table 2 (also reports the 2-MeO-BDE68 and 6-MeO-BDE47)	no conversion needed, SE of SumDDT and sumHCH are available in table 1 for yolk concentrations. SE of SumHCH in yolk is also in table 1, but this includes Lindane (nonetheless we use this value as we do not know individual SEs).
Garcia-Besne et al. 2015	Values are reported in ng/g lipid in eggs of green turtles (table 5) and hawksbill turtles (table 6).	Values are reported in ng/g lipid in eggs of green turtles (table 5) and hawksbill turtles (table 6).	not reported	The study does not report lipid concentrations in whole eggs. Lipid contents have been reported in the area (e.g. Munoz and Vermeiren 2018, Alava et al 2011, 2006, Keller et al 2012), but these were always within the yolk, this prevented us from using these to convert lipid normalized concentrations reported for the whole egg.
De Andres et al. 2016	Not reported	Individual congener contributions (in %) to the sumPCB are displayed in figure 1. SumPCBs is reported in table 2 in pg/g wet mass for whole eggs.	Individual compound contributions (in %) to the sumPBDE are displayed in figure 1. SumPBDEs is reported in table 2 in pg/g wet mass for whole eggs.	Individual congener values of PCBs are digitized using ImageJ from figure 1 relative to the sumPCBs. Pg/g is then converted to ng/g by dividing by 1000.
Munoz &Vermeiren 2018	Report OCPs in table 4 in ng/g wet mass in yolk samples	Report individual PCB congeners in table 4 in ng/g wet mass in yolk samples	not reported	Max SD of any individual DDT was taken as the SD for SumDDTs, and then converted to SE using the sample size specific for that nest and compound
Salvarani et al. 2019	Sums of OCP groups are reported in table 1 in ng/g dry in whole eggs	Not reported	not reported	Wallace et al 2006 report average water contents (in %) for eggs of green( 66.7%) and hawksbill (59.4%) turtles. We use this to convert from dry to wet divided by water content in percentage). SDs were converted to wet mass, and then converted to SE using the specific samples sizes for the compound, species and year
